# Supplementary material for: Assessment of Corticosteroid Therapy and Death or Disability According to Pretreatment Risk of Death or Bronchopulmonary Dysplasia in Extremely Preterm Infants
Source: PubMed Central journal article supplement (PMC10167571; doi:10.1001/jamanetworkopen.2023.12277), 2023-05-08
Supplement: jamanetwopen-e2312277-s001.pdf [file jamanetwopen-e2312277-s001.pdf]

## Supplemental Online Content

Jensen EA, Wiener LE, Rysavy MA, et al; Eunice Kennedy Shriver National Institute of Child Health and Human Development Neonatal Research Network. Assessment of corticosteroid therapy and death or disability according to pretreatment risk of death or bronchopulmonary dysplasia in extremely preterm infants. *JAMA Netw Open*. 2023;6(5):e2312277. doi:10.1001/jamanetworkopen.2023.12277

### **eAppendix.** Additional Information on the Statistical Analyses

**eTable 1.** Characteristics of Corticosteroid-Treated Infants Who Were Excluded Owing to Missing Data and Those Eligible for Matching

**eTable 2.** Characteristics of Untreated Infants Who Were Excluded Owing to Missing Data and Those Eligible for Matching

**eTable 3.** Characteristics of the Matched Corticosteroid-Treated Infants and Eligible But Unmatched Corticosteroid-Treated Infants (Excludes Infants With Missing Data)

**eTable 4.** Characteristics of Corticosteroid-Treated Infants and Untreated Controls Eligible for Matching (Excludes Infants With Missing Data)

**eTable 5.** Characteristics of Corticosteroid-Treated Infants and Untreated Controls in the Final Matched Cohort

**eFigure 1.** Distribution of Propensity Score Values in the Matched Cohort

**eFigure 2.** Distribution of the Timing of Corticosteroid Initiation

**eTable 6.** Rates and Timing of Mortality in the Matched Cohort

**eFigure 3.** Risk Differences for Death or Severe Disability Versus the Probability of Death or Grade 2-3 BPD

**eFigure 4.** Odds Ratios for Death or Moderate-to-Severe Disability Stratified by the Pre-Treatment Probability of Death or Grade 2-3 BPD as a 5-Level Categorical Variable

**eFigure 5.** Odds Ratios for Death or Severe Disability Stratified by the Pre-Treatment Probability of Death or Grade 2-3 BPD as a 5-Level Categorical Variable

**eFigure 6.** Odds Ratios for Death or Moderate to Severe Disability Stratified by Treatment With Dexamethasone vs. Hydrocortisone

This supplemental material has been provided by the authors to give readers additional information about their work.

**eAppendix.** Additional information on the statistical analyses

**Prediction of the pre-treatment probability of death or grade 2-3 bronchopulmonary dysplasia (BPD) by 36 weeks' postmenstrual age (PMA) in the eligible cohort:**

The pre-treatment probability of death or grade 2-3 BPD at 36 weeks' PMA was predicted using data recorded on all eligible untreated infants at all possible match PMAs using logistic regression. The model parameter estimates were then used to predict pre-treatment probabilities for all eligible infants who received corticosteroid therapy. The covariates used in the model are listed below. All variables were included in regression models as a dichotomous or categorical variable unless otherwise indicated. For continuous variables, the assumption of linear relationships between the independent variable and log odds of the primary outcome was assessed via graphical inspection and by testing of Box-Tidwell transformations.

- Antenatal steroids
- Antenatal antibiotics
- Private insurance
- Outborn status
- Birthweight (continuous variable, centered)
- Gestational age (completed weeks as a continuous variable)
- Sex
- Small for gestational age
- Surfactant
- Multiple birth
- Magnesium sulfate
- C-section
- Indomethacin
- Maternal hypertension
- Chorioamnionitis
- Intubation in the delivery room
- Chest compressions/epinephrine in the delivery room
- Enteral feeds initiated within 7 days of age
- Birth year (continuous variable, centered)
- Mother's highest education (< high school, high school graduate, > high school, missing)
- Mother's self-reported race (Black, White, other, missing)
- Hispanic origin of mother by self-report (yes, no, missing)
- Highest mode of respiratory support at 24 hours of age (high frequency ventilation, conventional ventilation, non-invasive intermittent pressure ventilation, nasal continuous positive airway pressure, nasal cannula/oxygen hood/no support)
- FiO<sub>2</sub> at 24 hours of age (categorical: 21%, 22%-30%, 31%-40%, 41%-50%, 51%-99%, 100%)
- Intraventricular hemorrhage (IVH) prior to corticosteroid initiation (or the equivalent PMA week for the untreated infant)
- Sepsis or meningitis prior to corticosteroid initiation (or the equivalent PMA week for the untreated infant)
- Surgical necrotizing enterocolitis (NEC) or spontaneous gastrointestinal perforation (SIP) prior to corticosteroid initiation (or the equivalent PMA week for the untreated infant)
- Nitric oxide prior to corticosteroid initiation (or the equivalent PMA week for the untreated infant)
- Days on invasive mechanical ventilation (IMV) prior to corticosteroid initiation (or the equivalent PMA week for the untreated infant) (continuous variable)
- Days on positive airway pressure (PAP) prior to corticosteroid initiation (or the equivalent PMA week for the untreated infant) (continuous variable)
- Last recorded FiO<sub>2</sub> prior to corticosteroid initiation (or the equivalent PMA week for the untreated infant) (categorical: 21%, 22%-30%, 31%-40%, 41%-50%, 51%-99%, 100%)
- Hypotension treatment at less than 24 hours of age

- Last recorded highest mode of respiratory support (high frequency ventilation, conventional ventilation, non-invasive intermittent pressure ventilation, nasal continuous positive airway pressure, nasal cannula/oxygen hood/no support) prior to corticosteroid initiation (or the equivalent PMA week for the untreated infant)
- Day of last recorded respiratory support (snapshot) (7, 14, or 28 days of age) prior to corticosteroid initiation (or the equivalent PMA week for the untreated infant) (continuous variable)
- Interactions (all assessed prior to corticosteroid initiation, or the equivalent PMA week for the untreated infant):
  - Invasive mechanical ventilation days × snapshot day
  - Positive airway pressure days × snapshot day
  - Last known FiO<sub>2</sub> × snapshot day
  - Last known mode of respiratory support × snapshot day

#### **Propensity score model covariates:**

The propensity score model included the same covariates as the model used to predict the pre-treatment probability of death or grade 2-3 BPD at 36 weeks' PMA. However, the propensity score model also exact (force) matched on the following variables:

- PMA of steroid initiation or the equivalent PMA for the untreated infant) (week)
- Gestational age at birth (week)
- Last recorded highest mode of respiratory support (high frequency ventilation, conventional ventilation, non-invasive intermittent pressure ventilation, nasal continuous positive airway pressure, nasal cannula/oxygen hood/no support) prior to corticosteroid initiation (or the equivalent PMA week for the untreated infant)
- Day of last recorded respiratory support (snapshot) (7, 14, or 28 days of age) prior to corticosteroid initiation (or the equivalent PMA week for the untreated infant)
- Decile of the predicted pre-treatment probability of death or grade 2-3 BPD at 36 weeks' PMA (estimated using in the full eligible cohort)

#### **Prediction of the pre-treatment probability of death or grade 2-3 BPD at 36 weeks' PMA in the matched sample:**

The predicted pre-treatment probability of death or grade 2-3 BPD at 36 weeks' PMA was recalculated based on data recorded for the untreated infants in the matched cohort up until the same PMA as the 1:1 matched corticosteroid-treated infants initiated corticosteroid therapy. The same covariates used in the pre-match model were used for the matched infants with the following exceptions:

- PMA week at corticosteroid initiation for the corresponding matched, treated infant was included as a covariate
- Last recorded FiO<sub>2</sub> prior to the PMA week at corticosteroid initiation in the corresponding matched, treated infant was included as a continuous variable
- The model did not include last recorded mode respiratory support × snapshot day interaction

#### **Odds ratios:**

Stratifying by the pre-treatment probability of death or grade 2-3 BPD, logistic regression models used to estimate the within-stratum odds ratios for the 2-year corrected age composite outcomes (death or neurodevelopmental impairment and death or cerebral palsy) included the following explanatory (independent) variables:

- Center
- PMA week at corticosteroid initiation (or the equivalent PMA week in the untreated infant)
- Corticosteroid treatment status
- Stratified pre-treatment probability of death or grade 2-3 BPD at 36 weeks' PMA. Strata approximate the quintiles of the distribution: 0 to 0.25, >0.25 to 0.45, >0.45 to 0.65, >0.65 to 0.85, >0.85 to 1.00.
- Corticosteroid therapy status × pre-treatment probability of death or grade 2-3 BPD strata interaction

**Predicted probability of death or neurodevelopmental impairment (NDI) and death or cerebral palsy (CP) at 2 years' corrected age:**

The logistic regression models used to predict the probability of death or NDI and death or CP at 2 years' corrected age included the same covariates as the model used to predict the pre-treatment probability of death or grade 2-3 BPD at 36 weeks' PMA for the matched sample, with the addition of the following explanatory (independent) variables:

- Corticosteroid treatment status
- Predicted pre-treatment probability of death or grade 2-3 BPD at 36 weeks' PMA
- Corticosteroid therapy × pre-treatment probability of death or grade 2-3 BPD at 36 weeks' PMA interaction

**eTable 1.** Characteristics of corticosteroid-treated infants who were excluded owing to missing data and those eligible for matching.

| Variable                           |                        | Corticosteroid treated – excluded due to missing data<br>N = 90 | Corticosteroid treated – eligible for matching<br>N = 656 | Standardized Difference <sup>a</sup> |
|------------------------------------|------------------------|-----------------------------------------------------------------|-----------------------------------------------------------|--------------------------------------|
| Antenatal steroids                 |                        | 79/89 (89%)                                                     | 597/656 (91%)                                             | 0.0744                               |
| Antenatal antibiotics              |                        | 62/84 (74%)                                                     | 497/656 (76%)                                             | 0.0450                               |
| C-section                          |                        | 58/90 (64%)                                                     | 419/656 (64%)                                             | 0.0119                               |
| Magnesium sulfate                  |                        | 65/85 (76%)                                                     | 526/656 (80%)                                             | 0.0902                               |
| Mother's education                 | < High school          | 8/90 (9%)                                                       | 86/656 (13%)                                              | 0.2229                               |
|                                    | High school            | 28/90 (31%)                                                     | 151/656 (23%)                                             | 0.2229                               |
|                                    | > High school          | 33/90 (37%)                                                     | 283/656 (43%)                                             | 0.2229                               |
|                                    | Missing                | 21/90 (23%)                                                     | 136/656 (21%)                                             | 0.2229                               |
| Mother's race                      | Black                  | 28/90 (31%)                                                     | 277/656 (42%)                                             | 0.2870                               |
|                                    | White                  | 56/90 (62%)                                                     | 327/656 (50%)                                             | 0.2870                               |
|                                    | Other                  | 5/90 (6%)                                                       | 32/656 (5%)                                               | 0.2870                               |
|                                    | Missing                | 1/90 (1%)                                                       | 20/656 (3%)                                               | 0.2870                               |
| Hispanic origin of mother          | Hispanic or Latino     | 7/90 (8%)                                                       | 67/656 (10%)                                              | 0.0700                               |
|                                    | Not Hispanic or Latino | 82/90 (91%)                                                     | 583/656 (89%)                                             | 0.0700                               |
|                                    | Missing                | 1/90 (1%)                                                       | 6/656 (1%)                                                | 0.0700                               |
| Multiple birth                     |                        | 22/90 (24%)                                                     | 179/656 (27%)                                             | 0.0649                               |
| Private insurance                  |                        | 37/90 (41%)                                                     | 262/656 (40%)                                             | 0.0239                               |
| Maternal hypertension              |                        | 20/90 (22%)                                                     | 174/656 (27%)                                             | 0.1003                               |
| Birth weight (g), n, mean (SD)     |                        | 90, 734.8 (160.6)                                               | 656, 673.1 (135.3)                                        | 0.4154                               |
| Birth year                         | 2011                   | 12/90 (13%)                                                     | 88/656 (13%)                                              | 0.3493                               |
|                                    | 2012                   | 15/90 (17%)                                                     | 97/656 (15%)                                              | 0.3493                               |
|                                    | 2013                   | 5/90 (6%)                                                       | 98/656 (15%)                                              | 0.3493                               |
|                                    | 2014                   | 9/90 (10%)                                                      | 95/656 (14%)                                              | 0.3493                               |
|                                    | 2015                   | 20/90 (22%)                                                     | 114/656 (17%)                                             | 0.3493                               |
|                                    | 2016                   | 21/90 (23%)                                                     | 126/656 (19%)                                             | 0.3493                               |
|                                    | 2017                   | 8/90 (9%)                                                       | 38/656 (6%)                                               | 0.3493                               |
| Gestational age (wk), n, mean (SD) |                        | 90, 24.7 (1.1)                                                  | 656, 24.3 (1.1)                                           | 0.3485                               |
| Outborn                            |                        | 5/90 (6%)                                                       | 9/656 (1%)                                                | 0.2303                               |
| Male                               |                        | 45/90 (50%)                                                     | 374/656 (57%)                                             | 0.1409                               |

**eTable 1.** Characteristics of corticosteroid-treated infants who were excluded owing to missing data and those eligible for matching.

| <i>Variable</i>                                         |                                 | <i>Corticosteroid treated – excluded due to missing data<br/>N = 90</i> | <i>Corticosteroid treated – eligible for matching<br/>N = 656</i> | <i>Standardized Difference<sup>a</sup></i> |
|---------------------------------------------------------|---------------------------------|-------------------------------------------------------------------------|-------------------------------------------------------------------|--------------------------------------------|
| Small for gestational age                               |                                 | 4/90 (4%)                                                               | 61/656 (9%)                                                       | 0.1928                                     |
| Chest compressions/epinephrine in the delivery room     |                                 | 10/90 (11%)                                                             | 50/656 (8%)                                                       | 0.1200                                     |
| Intubation in the delivery room                         |                                 | 77/90 (86%)                                                             | 573/656 (87%)                                                     | 0.0524                                     |
| Surfactant                                              |                                 | 86/90 (96%)                                                             | 634/656 (97%)                                                     | 0.0564                                     |
| Chorioamnionitis                                        |                                 | 9/86 (10%)                                                              | 128/656 (20%)                                                     | 0.2555                                     |
| Treatment for hypotension in the first 24hr after birth |                                 | 23/90 (26%)                                                             | 241/656 (37%)                                                     | 0.2432                                     |
| Indomethacin in the first 24hr after birth              |                                 | 35/90 (39%)                                                             | 243/656 (37%)                                                     | 0.0380                                     |
| Enteral feeds initiated within 7 days after birth       |                                 | 79/90 (88%)                                                             | 556/656 (85%)                                                     | 0.0879                                     |
| Highest mode of respiratory support at 24hr of age      | High frequency ventilation      | 23/89 (26%)                                                             | 155/656 (24%)                                                     | 0.2267                                     |
|                                                         | Conventional ventilation        | 58/89 (65%)                                                             | 398/656 (61%)                                                     | 0.2267                                     |
|                                                         | NIMV                            | 1/89 (1%)                                                               | 27/656 (4%)                                                       | 0.2267                                     |
|                                                         | nCPAP                           | 6/89 (7%)                                                               | 70/656 (11%)                                                      | 0.2267                                     |
|                                                         | NC, Hood, or No support         | 1/89 (1%)                                                               | 6/656 (1%)                                                        | 0.2267                                     |
|                                                         | FiO <sub>2</sub> at 24hr of age | 21%                                                                     | 20/89 (22%)                                                       | 96/656 (15%)                               |
|                                                         | (21%, 30%]                      | 32/89 (36%)                                                             | 253/656 (39%)                                                     | 0.2561                                     |
|                                                         | (30%, 40%]                      | 18/89 (20%)                                                             | 160/656 (24%)                                                     | 0.2561                                     |
|                                                         | (40%, 50%]                      | 5/89 (6%)                                                               | 60/656 (9%)                                                       | 0.2561                                     |
|                                                         | (50%, 100%)                     | 8/89 (9%)                                                               | 61/656 (9%)                                                       | 0.2561                                     |
|                                                         | 100%                            | 6/89 (7%)                                                               | 26/656 (4%)                                                       | 0.2561                                     |
| Center                                                  | 3                               | 7/90 (8%)                                                               | 52/656 (8%)                                                       | 0.6526                                     |
|                                                         | 4                               | 1/90 (1%)                                                               | 9/656 (1%)                                                        | 0.6526                                     |
|                                                         | 5                               |                                                                         | 5/656 (1%)                                                        | 0.6526                                     |
|                                                         | 9                               | 1/90 (1%)                                                               | 6/656 (1%)                                                        | 0.6526                                     |
|                                                         | 11                              | 14/90 (16%)                                                             | 75/656 (11%)                                                      | 0.6526                                     |
|                                                         | 12                              | 4/90 (4%)                                                               | 17/656 (3%)                                                       | 0.6526                                     |
|                                                         | 14                              | 3/90 (3%)                                                               | 37/656 (6%)                                                       | 0.6526                                     |

**eTable 1.** Characteristics of corticosteroid-treated infants who were excluded owing to missing data and those eligible for matching.

| <i>Variable</i>      |    | <i>Corticosteroid treated – excluded due to missing data<br/>N = 90</i> | <i>Corticosteroid treated – eligible for matching<br/>N = 656</i> | <i>Standardized Difference<sup>a</sup></i> |
|----------------------|----|-------------------------------------------------------------------------|-------------------------------------------------------------------|--------------------------------------------|
| Center, <i>cont.</i> | 15 |                                                                         | 14/656 (2%)                                                       | 0.6526                                     |
|                      | 16 | 2/90 (2%)                                                               | 62/656 (9%)                                                       | 0.6526                                     |
|                      | 18 | 7/90 (8%)                                                               | 49/656 (7%)                                                       | 0.6526                                     |
|                      | 19 | 8/90 (9%)                                                               | 93/656 (14%)                                                      | 0.6526                                     |
|                      | 24 | 12/90 (13%)                                                             | 53/656 (8%)                                                       | 0.6526                                     |
|                      | 25 | 5/90 (6%)                                                               | 26/656 (4%)                                                       | 0.6526                                     |
|                      | 26 | 1/90 (1%)                                                               | 14/656 (2%)                                                       | 0.6526                                     |
|                      | 27 | 5/90 (6%)                                                               | 66/656 (10%)                                                      | 0.6526                                     |
|                      | 28 | 15/90 (17%)                                                             | 48/656 (7%)                                                       | 0.6526                                     |
|                      | 29 |                                                                         | 6/656 (1%)                                                        | 0.6526                                     |
|                      | 30 | 2/90 (2%)                                                               | 7/656 (1%)                                                        | 0.6526                                     |
|                      | 31 | 3/90 (3%)                                                               | 17/656 (3%)                                                       | 0.6526                                     |

<sup>a</sup> Data are absolute values

*Abbreviations: FiO<sub>2</sub>, fraction of inspired oxygen; n, number of infants with evaluable data for the specified characteristic; NC, nasal cannula; nCPAP, nasal continuous positive airway pressure; NIMV, non-invasive mechanical ventilation; SD, standard deviation*



**eTable 2.** Characteristics of untreated infants who were excluded owing to missing data and those eligible for matching.

| <i>Variable</i>                    |                        | <i>Untreated –<br/>excluded due to<br/>missing data<br/>N = 597</i> | <i>Untreated –<br/>eligible for<br/>matching<br/>N = 2796</i> | <i>Standardized<br/>Difference<sup>a</sup></i> |
|------------------------------------|------------------------|---------------------------------------------------------------------|---------------------------------------------------------------|------------------------------------------------|
| Antenatal corticosteroids          |                        | 538/592 (91%)                                                       | 2507/2796 (90%)                                               | 0.0410                                         |
| Antenatal antibiotics              |                        | 416/566 (73%)                                                       | 2095/2796 (75%)                                               | 0.0327                                         |
| C-section                          |                        | 357/594 (60%)                                                       | 1781/2796 (64%)                                               | 0.0741                                         |
| Antenatal magnesium sulfate        |                        | 455/570 (80%)                                                       | 2176/2796 (78%)                                               | 0.0489                                         |
| Mother's education                 | < High school          | 80/597 (13%)                                                        | 441/2796 (16%)                                                | 0.1554                                         |
|                                    | High school            | 144/597 (24%)                                                       | 689/2796 (25%)                                                | 0.1554                                         |
|                                    | > High school          | 227/597 (38%)                                                       | 1131/2796 (40%)                                               | 0.1554                                         |
|                                    | Missing                | 146/597 (24%)                                                       | 535/2796 (19%)                                                | 0.1554                                         |
| Mother's race                      | Black                  | 237/597 (40%)                                                       | 1243/2796 (44%)                                               | 0.1268                                         |
|                                    | White                  | 286/597 (48%)                                                       | 1320/2796 (47%)                                               | 0.1268                                         |
|                                    | Other                  | 51/597 (9%)                                                         | 156/2796 (6%)                                                 | 0.1268                                         |
|                                    | Missing                | 23/597 (4%)                                                         | 77/2796 (3%)                                                  | 0.1268                                         |
| Hispanic origin of mother          | Hispanic or Latino     | 78/597 (13%)                                                        | 419/2796 (15%)                                                | 0.0983                                         |
|                                    | Not Hispanic or Latino | 510/597 (85%)                                                       | 2346/2796 (84%)                                               | 0.0983                                         |
|                                    | Missing                | 9/597 (2%)                                                          | 31/2796 (1%)                                                  | 0.0983                                         |
| Multiple birth                     |                        | 138/597 (23%)                                                       | 695/2796 (25%)                                                | 0.0408                                         |
| Private insurance                  |                        | 206/596 (35%)                                                       | 1037/2796 (37%)                                               | 0.0527                                         |
| Maternal hypertension              |                        | 102/588 (17%)                                                       | 642/2796 (23%)                                                | 0.1403                                         |
| Birth weight (g), n, mean (SD)     |                        | 597, 809.1 (161.1)                                                  | 2796, 763 (166.3)                                             | 0.2814                                         |
| Birth year                         | 2011                   | 75/597 (13%)                                                        | 378/2796 (14%)                                                | 0.1324                                         |
|                                    | 2012                   | 113/597 (19%)                                                       | 493/2796 (18%)                                                | 0.1324                                         |
|                                    | 2013                   | 84/597 (14%)                                                        | 468/2796 (17%)                                                | 0.1324                                         |
|                                    | 2014                   | 105/597 (18%)                                                       | 479/2796 (17%)                                                | 0.1324                                         |
|                                    | 2015                   | 99/597 (17%)                                                        | 481/2796 (17%)                                                | 0.1324                                         |
|                                    | 2016                   | 99/597 (17%)                                                        | 405/2796 (14%)                                                | 0.1324                                         |
|                                    | 2017                   | 22/597 (4%)                                                         | 92/2796 (3%)                                                  | 0.1324                                         |
| Gestational age (wk), n, mean (SD) |                        | 597, 25.2 (0.9)                                                     | 2796, 24.9 (1.1)                                              | 0.2719                                         |

**eTable 2.** Characteristics of untreated infants who were excluded owing to missing data and those eligible for matching.

| <i>Variable</i>                                         |                            | <i>Untreated –<br/>excluded due to<br/>missing data<br/>N = 597</i> | <i>Untreated –<br/>eligible for<br/>matching<br/>N = 2796</i> | <i>Standardized<br/>Difference<sup>a</sup></i> |
|---------------------------------------------------------|----------------------------|---------------------------------------------------------------------|---------------------------------------------------------------|------------------------------------------------|
| Outborn                                                 |                            | 37/597 (6%)                                                         | 52/2796 (2%)                                                  | 0.2220                                         |
| Male                                                    |                            | 306/593 (52%)                                                       | 1362/2796 (49%)                                               | 0.0578                                         |
| Small for gestational age                               |                            | 20/593 (3%)                                                         | 160/2796 (6%)                                                 | 0.1130                                         |
| Chest compressions/epinephrine in the delivery room     |                            | 46/596 (8%)                                                         | 227/2796 (8%)                                                 | 0.0148                                         |
| Intubation in the delivery room                         |                            | 445/597 (75%)                                                       | 2133/2796 (76%)                                               | 0.0406                                         |
| Surfactant                                              |                            | 513/597 (86%)                                                       | 2471/2796 (88%)                                               | 0.0732                                         |
| Chorioamnionitis                                        |                            | 90/580 (16%)                                                        | 472/2796 (17%)                                                | 0.0370                                         |
| Treatment for hypotension in the first 24hr after birth |                            | 166/596 (28%)                                                       | 825/2796 (30%)                                                | 0.0366                                         |
| Indomethacin in the first 24hr after birth              |                            | 237/597 (40%)                                                       | 1179/2796 (42%)                                               | 0.0502                                         |
| Enteral feeds initiated within 7 days of age            |                            | 511/594 (86%)                                                       | 2460/2796 (88%)                                               | 0.0582                                         |
| Highest mode of respiratory support at 24hr of age      | High frequency ventilation | 63/584 (11%)                                                        | 373/2796 (13%)                                                | 0.1097                                         |
|                                                         | Conventional ventilation   | 325/584 (56%)                                                       | 1581/2796 (57%)                                               | 0.1097                                         |
|                                                         | NIMV                       | 36/584 (6%)                                                         | 183/2796 (7%)                                                 | 0.1097                                         |
|                                                         | nCPAP                      | 150/584 (26%)                                                       | 603/2796 (22%)                                                | 0.1097                                         |
|                                                         | NC, Hood, or No support    | 10/584 (2%)                                                         | 56/2796 (2%)                                                  | 0.1097                                         |
| FiO <sub>2</sub> at 24hr of age                         | 21%                        | 190/586 (32%)                                                       | 860/2796 (31%)                                                | 0.1826                                         |
|                                                         | (21%, 30%]                 | 210/586 (36%)                                                       | 942/2796 (34%)                                                | 0.1826                                         |
|                                                         | (30%, 40%]                 | 102/586 (17%)                                                       | 492/2796 (18%)                                                | 0.1826                                         |
|                                                         | (40%, 50%]                 | 41/586 (7%)                                                         | 217/2796 (8%)                                                 | 0.1826                                         |
|                                                         | (50%, 100%)                | 25/586 (4%)                                                         | 185/2796 (7%)                                                 | 0.1826                                         |
|                                                         | 100%                       | 18/586 (3%)                                                         | 100/2796 (4%)                                                 | 0.1826                                         |
| Center                                                  | 3                          | 21/597 (4%)                                                         | 103/2796 (4%)                                                 | 0.4810                                         |
|                                                         | 4                          | 3/597 (1%)                                                          | 140/2796 (5%)                                                 | 0.4810                                         |
|                                                         | 5                          | 26/597 (4%)                                                         | 126/2796 (5%)                                                 | 0.4810                                         |

**eTable 2.** Characteristics of untreated infants who were excluded owing to missing data and those eligible for matching.

| Variable      |    | Untreated –<br>excluded due to<br>missing data<br>N = 597 | Untreated –<br>eligible for<br>matching<br>N = 2796 | Standardized<br>Difference <sup>a</sup> |
|---------------|----|-----------------------------------------------------------|-----------------------------------------------------|-----------------------------------------|
|               | 9  | 29/597 (5%)                                               | 185/2796 (7%)                                       | 0.4810                                  |
|               | 11 | 29/597 (5%)                                               | 199/2796 (7%)                                       | 0.4810                                  |
| Center, cont. | 12 | 19/597 (3%)                                               | 94/2796 (3%)                                        | 0.4810                                  |
|               | 14 | 26/597 (4%)                                               | 147/2796 (5%)                                       | 0.4810                                  |
|               | 15 | 31/597 (5%)                                               | 93/2796 (3%)                                        | 0.4810                                  |
|               | 16 | 49/597 (8%)                                               | 287/2796 (10%)                                      | 0.4810                                  |
|               | 18 | 59/597 (10%)                                              | 258/2796 (9%)                                       | 0.4810                                  |
|               | 19 | 68/597 (11%)                                              | 318/2796 (11%)                                      | 0.4810                                  |
|               | 24 | 32/597 (5%)                                               | 164/2796 (6%)                                       | 0.4810                                  |
|               | 25 | 7/597 (1%)                                                | 21/2796 (1%)                                        | 0.4810                                  |
|               | 26 | 7/597 (1%)                                                | 47/2796 (2%)                                        | 0.4810                                  |
|               | 27 | 22/597 (4%)                                               | 180/2796 (6%)                                       | 0.4810                                  |
|               | 28 | 83/597 (14%)                                              | 153/2796 (5%)                                       | 0.4810                                  |
|               | 29 | 6/597 (1%)                                                | 29/2796 (1%)                                        | 0.4810                                  |
|               | 30 | 73/597 (12%)                                              | 195/2796 (7%)                                       | 0.4810                                  |
|               | 31 | 7/597 (1%)                                                | 57/2796 (2%)                                        | 0.4810                                  |

<sup>a</sup> Data are absolute values

Abbreviations: *FiO<sub>2</sub>*, fraction of inspired oxygen; *n*, number of infants with evaluable data for the specified characteristic; *NC*, nasal cannula; *nCPAP*, nasal continuous positive airway pressure; *NIMV*, non-invasive mechanical ventilation; *SD*, standard deviation

**eTable 3.** Characteristics of the matched corticosteroid-treated infants and eligible but unmatched corticosteroid-treated infants (excludes infants with missing data)

| <i>Variable</i>                    |                        | <i>Matched<br/>corticosteroid<br/>treated<br/>N = 482</i> | <i>Unmatched<br/>corticosteroid<br/>treated<br/>N = 174</i> | <i>Standardized<br/>Difference<sup>a</sup></i> |
|------------------------------------|------------------------|-----------------------------------------------------------|-------------------------------------------------------------|------------------------------------------------|
| Antenatal corticosteroids          |                        | 435/482 (90%)                                             | 162/174 (93%)                                               | 0.1035                                         |
| Antenatal antibiotics              |                        | 357/482 (74%)                                             | 140/174 (80%)                                               | 0.1530                                         |
| C-section                          |                        | 313/482 (65%)                                             | 106/174 (61%)                                               | 0.0833                                         |
| Antenatal magnesium sulfate        |                        | 385/482 (80%)                                             | 141/174 (81%)                                               | 0.0292                                         |
| Mother's education                 | < High school          | 63/482 (13%)                                              | 23/174 (13%)                                                | 0.0613                                         |
|                                    | High school            | 114/482 (24%)                                             | 37/174 (21%)                                                | 0.0613                                         |
|                                    | > High school          | 207/482 (43%)                                             | 76/174 (44%)                                                | 0.0613                                         |
|                                    | Missing                | 98/482 (20%)                                              | 38/174 (22%)                                                | 0.0613                                         |
| Mother's race                      | Black                  | 198/482 (41%)                                             | 79/174 (45%)                                                | 0.2416                                         |
|                                    | White                  | 242/482 (50%)                                             | 85/174 (49%)                                                | 0.2416                                         |
|                                    | Other                  | 29/482 (6%)                                               | 3/174 (2%)                                                  | 0.2416                                         |
|                                    | Missing                | 13/482 (3%)                                               | 7/174 (4%)                                                  | 0.2416                                         |
| Hispanic origin of mother          | Hispanic or Latino     | 53/482 (11%)                                              | 14/174 (8%)                                                 | 0.1048                                         |
|                                    | Not Hispanic or Latino | 425/482 (88%)                                             | 158/174 (91%)                                               | 0.1048                                         |
|                                    | Missing                | 4/482 (1%)                                                | 2/174 (1%)                                                  | 0.1048                                         |
| Multiple birth                     |                        | 127/482 (26%)                                             | 52/174 (30%)                                                | 0.0787                                         |
| Private insurance                  |                        | 190/482 (39%)                                             | 72/174 (41%)                                                | 0.0400                                         |
| Maternal hypertension              |                        | 125/482 (26%)                                             | 49/174 (28%)                                                | 0.0502                                         |
| Birth weight (g), n, mean (SD)     |                        | 482, 682.1 (134.9)                                        | 174, 648.2 (133.7)                                          | 0.2525                                         |
| Birth year                         | 2011                   | 63/482 (13%)                                              | 25/174 (14%)                                                | 0.1401                                         |
|                                    | 2012                   | 75/482 (16%)                                              | 22/174 (13%)                                                | 0.1401                                         |
|                                    | 2013                   | 71/482 (15%)                                              | 27/174 (16%)                                                | 0.1401                                         |
|                                    | 2014                   | 74/482 (15%)                                              | 21/174 (12%)                                                | 0.1401                                         |
|                                    | 2015                   | 82/482 (17%)                                              | 32/174 (18%)                                                | 0.1401                                         |
|                                    | 2016                   | 90/482 (19%)                                              | 36/174 (21%)                                                | 0.1401                                         |
|                                    | 2017                   | 27/482 (6%)                                               | 11/174 (6%)                                                 | 0.1401                                         |
| Gestational age (wk), n, mean (SD) |                        | 482, 24.4 (1.1)                                           | 174, 24.2 (1.2)                                             | 0.1263                                         |

**eTable 3.** Characteristics of the matched corticosteroid-treated infants and eligible but unmatched corticosteroid-treated infants (excludes infants with missing data)

| <i>Variable</i>                                         |                            | <i>Matched<br/>corticosteroid<br/>treated<br/>N = 482</i> | <i>Unmatched<br/>corticosteroid<br/>treated<br/>N = 174</i> | <i>Standardized<br/>Difference<sup>a</sup></i> |
|---------------------------------------------------------|----------------------------|-----------------------------------------------------------|-------------------------------------------------------------|------------------------------------------------|
| Outborn                                                 |                            | 8/482 (2%)                                                | 1/174 (1%)                                                  | 0.1034                                         |
| Male                                                    |                            | 270/482 (56%)                                             | 104/174 (60%)                                               | 0.0761                                         |
| Small for gestational age                               |                            | 41/482 (9%)                                               | 20/174 (11%)                                                | 0.0997                                         |
| Chest compressions/epinephrine in the delivery room     |                            | 40/482 (8%)                                               | 10/174 (6%)                                                 | 0.1000                                         |
| Intubation in the delivery room                         |                            | 415/482 (86%)                                             | 158/174 (91%)                                               | 0.1476                                         |
| Surfactant                                              |                            | 463/482 (96%)                                             | 171/174 (98%)                                               | 0.1340                                         |
| Chorioamnionitis                                        |                            | 85/482 (18%)                                              | 43/174 (25%)                                                | 0.1739                                         |
| Treatment for hypotension in the first 24hr after birth |                            | 191/482 (40%)                                             | 50/174 (29%)                                                | 0.2311                                         |
| Indomethacin in the first 24hr after birth              |                            | 182/482 (38%)                                             | 61/174 (35%)                                                | 0.0562                                         |
| Enteral feeds initiated within 7 days of age            |                            | 411/482 (85%)                                             | 145/174 (83%)                                               | 0.0532                                         |
| Highest mode of respiratory support at 24hr of age      | High frequency ventilation | 117/482 (24%)                                             | 38/174 (22%)                                                | 0.1411                                         |
|                                                         | Conventional ventilation   | 285/482 (59%)                                             | 113/174 (65%)                                               | 0.1411                                         |
|                                                         | NIMV                       | 22/482 (5%)                                               | 5/174 (3%)                                                  | 0.1411                                         |
|                                                         | nCPAP                      | 53/482 (11%)                                              | 17/174 (10%)                                                | 0.1411                                         |
|                                                         | NC, Hood, or No support    | 5/482 (1%)                                                | 1/174 (1%)                                                  | 0.1411                                         |
| FiO <sub>2</sub> at 24hr of age                         | 21%                        | 71/482 (15%)                                              | 25/174 (14%)                                                | 0.1011                                         |
|                                                         | (21%, 30%]                 | 185/482 (38%)                                             | 68/174 (39%)                                                | 0.1011                                         |
|                                                         | (30%, 40%]                 | 118/482 (24%)                                             | 42/174 (24%)                                                | 0.1011                                         |
|                                                         | (40%, 50%]                 | 47/482 (10%)                                              | 13/174 (7%)                                                 | 0.1011                                         |
|                                                         | (50%, 100%)                | 43/482 (9%)                                               | 18/174 (10%)                                                | 0.1011                                         |
|                                                         | 100%                       | 18/482 (4%)                                               | 8/174 (5%)                                                  | 0.1011                                         |
| Center                                                  | 3                          | 35/482 (7%)                                               | 17/174 (10%)                                                | 0.7039                                         |
|                                                         | 4                          | 9/482 (2%)                                                | 0/174 (0%)                                                  | 0.7039                                         |
|                                                         | 5                          | 5/482 (1%)                                                | 0/174 (0%)                                                  | 0.7039                                         |

**eTable 3.** Characteristics of the matched corticosteroid-treated infants and eligible but unmatched corticosteroid-treated infants (excludes infants with missing data)

| Variable             |    | <i>Matched<br/>corticosteroid<br/>treated<br/>N = 482</i> | <i>Unmatched<br/>corticosteroid<br/>treated<br/>N = 174</i> | <i>Standardized<br/>Difference<sup>a</sup></i> |
|----------------------|----|-----------------------------------------------------------|-------------------------------------------------------------|------------------------------------------------|
|                      | 9  | 6/482 (1%)                                                | 0/174 (0%)                                                  | 0.7039                                         |
|                      | 11 | 49/482 (10%)                                              | 26/174 (15%)                                                | 0.7039                                         |
| Center, <i>cont.</i> | 12 | 17/482 (4%)                                               | 0/174 (0%)                                                  | 0.7039                                         |
|                      | 14 | 23/482 (5%)                                               | 14/174 (8%)                                                 | 0.7039                                         |
|                      | 15 | 14/482 (3%)                                               | 0/174 (0%)                                                  | 0.7039                                         |
|                      | 16 | 42/482 (9%)                                               | 20/174 (11%)                                                | 0.7039                                         |
|                      | 18 | 39/482 (8%)                                               | 10/174 (6%)                                                 | 0.7039                                         |
|                      | 19 | 65/482 (13%)                                              | 28/174 (16%)                                                | 0.7039                                         |
|                      | 24 | 49/482 (10%)                                              | 4/174 (2%)                                                  | 0.7039                                         |
|                      | 25 | 17/482 (4%)                                               | 9/174 (5%)                                                  | 0.7039                                         |
|                      | 26 | 9/482 (2%)                                                | 5/174 (3%)                                                  | 0.7039                                         |
|                      | 27 | 46/482 (10%)                                              | 20/174 (11%)                                                | 0.7039                                         |
|                      | 28 | 36/482 (7%)                                               | 12/174 (7%)                                                 | 0.7039                                         |
|                      | 29 | 6/482 (1%)                                                | 0/174 (0%)                                                  | 0.7039                                         |
|                      | 30 | 6/482 (1%)                                                | 1/174 (1%)                                                  | 0.7039                                         |
|                      | 31 | 9/482 (2%)                                                | 8/174 (5%)                                                  | 0.7039                                         |

<sup>a</sup> Data are absolute values

*Abbreviations: FiO<sub>2</sub>, fraction of inspired oxygen; n, number of infants with evaluable data for the specified characteristic; NC, nasal cannula; nCPAP, nasal continuous positive airway pressure; NIMV, non-invasive mechanical ventilation; SD, standard deviation*

**eTable 4.** Characteristics of corticosteroid-treated infants and untreated controls eligible for matching (excludes infants with missing data)

| <i>Variable</i>                    | <i>Corticosteroid treated</i><br><i>N = 656</i> | <i>Untreated potential controls</i><br><i>N = 2796</i> | <i>Standardized Difference<sup>a</sup></i> |        |
|------------------------------------|-------------------------------------------------|--------------------------------------------------------|--------------------------------------------|--------|
| Antenatal corticosteroids          | 597/656 (91%)                                   | 2507/2796 (90%)                                        | 0.0454                                     |        |
| Antenatal antibiotics              | 497/656 (76%)                                   | 2095/2796 (75%)                                        | 0.0193                                     |        |
| C-section                          | 419/656 (64%)                                   | 1781/2796 (64%)                                        | 0.0036                                     |        |
| Antenatal magnesium sulfate        | 526/656 (80%)                                   | 2176/2796 (78%)                                        | 0.0579                                     |        |
| Mother's education                 | < High school                                   | 86/656 (13%)                                           | 441/2796 (16%)                             | 0.0951 |
|                                    | High school                                     | 151/656 (23%)                                          | 689/2796 (25%)                             | 0.0951 |
|                                    | > High school                                   | 283/656 (43%)                                          | 1131/2796 (40%)                            | 0.0951 |
|                                    | Missing                                         | 136/656 (21%)                                          | 535/2796 (19%)                             | 0.0951 |
| Mother's race                      | Black                                           | 277/656 (42%)                                          | 1243/2796 (44%)                            | 0.0619 |
|                                    | White                                           | 327/656 (50%)                                          | 1320/2796 (47%)                            | 0.0619 |
|                                    | Other                                           | 32/656 (5%)                                            | 156/2796 (6%)                              | 0.0619 |
|                                    | Missing                                         | 20/656 (3%)                                            | 77/2796 (3%)                               | 0.0619 |
| Hispanic origin of mother          | Hispanic or Latino                              | 67/656 (10%)                                           | 419/2796 (15%)                             | 0.1463 |
|                                    | Not Hispanic or Latino                          | 583/656 (89%)                                          | 2346/2796 (84%)                            | 0.1463 |
|                                    | Missing                                         | 6/656 (1%)                                             | 31/2796 (1%)                               | 0.1463 |
| Multiple birth                     | 179/656 (27%)                                   | 695/2796 (25%)                                         | 0.0554                                     |        |
| Private insurance                  | 262/656 (40%)                                   | 1037/2796 (37%)                                        | 0.0586                                     |        |
| Maternal hypertension              | 174/656 (27%)                                   | 642/2796 (23%)                                         | 0.0826                                     |        |
| Birth weight (g), n, mean (SD)     | 656, 673.1 (135.3)                              | 2796, 763.0 (166.3)                                    | 0.5930                                     |        |
| Birth year                         | 2011                                            | 88/656 (13%)                                           | 378/2796 (14%)                             | 0.1972 |
|                                    | 2012                                            | 97/656 (15%)                                           | 493/2796 (18%)                             | 0.1972 |
|                                    | 2013                                            | 98/656 (15%)                                           | 468/2796 (17%)                             | 0.1972 |
|                                    | 2014                                            | 95/656 (14%)                                           | 479/2796 (17%)                             | 0.1972 |
|                                    | 2015                                            | 114/656 (17%)                                          | 481/2796 (17%)                             | 0.1972 |
|                                    | 2016                                            | 126/656 (19%)                                          | 405/2796 (14%)                             | 0.1972 |
|                                    | 2017                                            | 38/656 (6%)                                            | 92/2796 (3%)                               | 0.1972 |
| Gestational age (wk), n, mean (SD) | 656, 24.3 (1.1)                                 | 2796, 24.9 (1.1)                                       | 0.5690                                     |        |
| Outborn                            | 9/656 (1%)                                      | 52/2796 (2%)                                           | 0.0387                                     |        |

**eTable 4.** Characteristics of corticosteroid-treated infants and untreated controls eligible for matching (excludes infants with missing data)

| <i>Variable</i>                                         |                            | <i>Corticosteroid treated<br/>N = 656</i> | <i>Untreated potential controls<br/>N = 2796</i> | <i>Standardized Difference<sup>a</sup></i> |
|---------------------------------------------------------|----------------------------|-------------------------------------------|--------------------------------------------------|--------------------------------------------|
| Male                                                    |                            | 374/656 (57%)                             | 1362/2796 (49%)                                  | 0.1668                                     |
| Small for gestational age                               |                            | 61/656 (9%)                               | 160/2796 (6%)                                    | 0.1360                                     |
| Chest compressions/epinephrine in the delivery room     |                            | 50/656 (8%)                               | 227/2796 (8%)                                    | 0.0184                                     |
| Intubation in the delivery room                         |                            | 573/656 (87%)                             | 2133/2796 (76%)                                  | 0.2897                                     |
| Surfactant                                              |                            | 634/656 (97%)                             | 2471/2796 (88%)                                  | 0.3182                                     |
| Chorioamnionitis                                        |                            | 128/656 (20%)                             | 472/2796 (17%)                                   | 0.0682                                     |
| Treatment for hypotension in the first 24hr after birth |                            | 241/656 (37%)                             | 825/2796 (30%)                                   | 0.1541                                     |
| Indomethacin in the first 24hr after birth              |                            | 243/656 (37%)                             | 1179/2796 (42%)                                  | 0.1049                                     |
| Enteral feeds initiated within 7 days of age            |                            | 556/656 (85%)                             | 2460/2796 (88%)                                  | 0.0941                                     |
| Highest mode of respiratory support at 24hr of age      | High frequency ventilation | 155/656 (24%)                             | 373/2796 (13%)                                   | 0.3989                                     |
|                                                         | Conventional ventilation   | 398/656 (61%)                             | 1581/2796 (57%)                                  | 0.3989                                     |
|                                                         | NIMV                       | 27/656 (4%)                               | 183/2796 (7%)                                    | 0.3989                                     |
|                                                         | nCPAP                      | 70/656 (11%)                              | 603/2796 (22%)                                   | 0.3989                                     |
|                                                         | NC, Hood, or No support    | 6/656 (1%)                                | 56/2796 (2%)                                     | 0.3989                                     |
| FiO <sub>2</sub> at 24hr of age                         | 21%                        | 96/656 (15%)                              | 860/2796 (31%)                                   | 0.4013                                     |
|                                                         | (21%, 30%]                 | 253/656 (39%)                             | 942/2796 (34%)                                   | 0.4013                                     |
|                                                         | (30%, 40%]                 | 160/656 (24%)                             | 492/2796 (18%)                                   | 0.4013                                     |
|                                                         | (40%, 50%]                 | 60/656 (9%)                               | 217/2796 (8%)                                    | 0.4013                                     |
|                                                         | (50%, 100%)                | 61/656 (9%)                               | 185/2796 (7%)                                    | 0.4013                                     |
|                                                         | 100%                       | 26/656 (4%)                               | 100/2796 (4%)                                    | 0.4013                                     |
| Center                                                  | 3                          | 52/656 (8%)                               | 103/2796 (4%)                                    | 0.6772                                     |
|                                                         | 4                          | 9/656 (1%)                                | 140/2796 (5%)                                    | 0.6772                                     |
|                                                         | 5                          | 5/656 (1%)                                | 126/2796 (5%)                                    | 0.6772                                     |
|                                                         | 9                          | 6/656 (1%)                                | 185/2796 (7%)                                    | 0.6772                                     |
|                                                         | 11                         | 75/656 (11%)                              | 199/2796 (7%)                                    | 0.6772                                     |



**eTable 4.** Characteristics of corticosteroid-treated infants and untreated controls eligible for matching (excludes infants with missing data)

| <i>Variable</i>      |    | <i>Corticosteroid treated<br/>N = 656</i> | <i>Untreated potential controls<br/>N = 2796</i> | <i>Standardized Difference<sup>a</sup></i> |
|----------------------|----|-------------------------------------------|--------------------------------------------------|--------------------------------------------|
| Center, <i>cont.</i> | 12 | 17/656 (3%)                               | 94/2796 (3%)                                     | 0.6772                                     |
|                      | 14 | 37/656 (6%)                               | 147/2796 (5%)                                    | 0.6772                                     |
|                      | 15 | 14/656 (2%)                               | 93/2796 (3%)                                     | 0.6772                                     |
|                      | 16 | 62/656 (9%)                               | 287/2796 (10%)                                   | 0.6772                                     |
|                      | 18 | 49/656 (7%)                               | 258/2796 (9%)                                    | 0.6772                                     |
|                      | 19 | 93/656 (14%)                              | 318/2796 (11%)                                   | 0.6772                                     |
|                      | 24 | 53/656 (8%)                               | 164/2796 (6%)                                    | 0.6772                                     |
|                      | 25 | 26/656 (4%)                               | 21/2796 (1%)                                     | 0.6772                                     |
|                      | 26 | 14/656 (2%)                               | 47/2796 (2%)                                     | 0.6772                                     |
|                      | 27 | 66/656 (10%)                              | 180/2796 (6%)                                    | 0.6772                                     |
|                      | 28 | 48/656 (7%)                               | 153/2796 (5%)                                    | 0.6772                                     |
|                      | 29 | 6/656 (1%)                                | 29/2796 (1%)                                     | 0.6772                                     |
|                      | 30 | 7/656 (1%)                                | 195/2796 (7%)                                    | 0.6772                                     |
|                      | 31 | 17/656 (3%)                               | 57/2796 (2%)                                     | 0.6772                                     |

<sup>a</sup> Data are absolute values

*Abbreviations: FiO<sub>2</sub>, fraction of inspired oxygen; n, number of infants with evaluable data for the specified characteristic; NC, nasal cannula; nCPAP, nasal continuous positive airway pressure; NIMV, non-invasive mechanical ventilation; SD, standard deviation*

**eTable 5.** Characteristics of corticosteroid-treated infants and untreated controls in the final matched cohort

| Variable                           |                        | Corticosteroid<br>Treated<br>N = 482 | Untreated<br>controls<br>N = 482 | Standardized<br>Difference <sup>a</sup> |
|------------------------------------|------------------------|--------------------------------------|----------------------------------|-----------------------------------------|
| Antenatal steroids                 |                        | 435/482 (90%)                        | 427/482 (89%)                    | 0.0540                                  |
| Antenatal antibiotics              |                        | 357/482 (74%)                        | 345/482 (72%)                    | 0.0560                                  |
| C-section                          |                        | 313/482 (65%)                        | 311/482 (65%)                    | 0.0087                                  |
| Antenatal magnesium sulfate        |                        | 385/482 (80%)                        | 373/482 (77%)                    | 0.0608                                  |
| Mother's education                 | < High school          | 63/482 (13%)                         | 60/482 (12%)                     | 0.0852                                  |
|                                    | High school            | 114/482 (24%)                        | 99/482 (21%)                     | 0.0852                                  |
|                                    | > High school          | 207/482 (43%)                        | 223/482 (46%)                    | 0.0852                                  |
|                                    | Missing                | 98/482 (20%)                         | 100/482 (21%)                    | 0.0852                                  |
| Mother's race                      | Black                  | 198/482 (41%)                        | 201/482 (42%)                    | 0.0675                                  |
|                                    | White                  | 242/482 (50%)                        | 247/482 (51%)                    | 0.0675                                  |
|                                    | Other                  | 29/482 (6%)                          | 25/482 (5%)                      | 0.0675                                  |
|                                    | Missing                | 13/482 (3%)                          | 9/482 (2%)                       | 0.0675                                  |
| Hispanic origin of mother          | Hispanic or Latino     | 53/482 (11%)                         | 54/482 (11%)                     | 0.0251                                  |
|                                    | Not Hispanic or Latino | 425/482 (88%)                        | 425/482 (88%)                    | 0.0251                                  |
|                                    | Missing                | 4/482 (1%)                           | 3/482 (1%)                       | 0.0251                                  |
| Multiple birth                     |                        | 127/482 (26%)                        | 127/482 (26%)                    | 0.0000                                  |
| Private insurance                  |                        | 190/482 (39%)                        | 194/482 (40%)                    | 0.0170                                  |
| Maternal hypertension              |                        | 125/482 (26%)                        | 133/482 (28%)                    | 0.0375                                  |
| Birth weight (g), n, mean (SD)     |                        | 482, 682.1 (134.9)                   | 482, 671.5 (146)                 | 0.0756                                  |
| Birth year                         | 2011                   | 63/482 (13%)                         | 63/482 (13%)                     | 0.1468                                  |
|                                    | 2012                   | 75/482 (16%)                         | 70/482 (15%)                     | 0.1468                                  |
|                                    | 2013                   | 71/482 (15%)                         | 82/482 (17%)                     | 0.1468                                  |
|                                    | 2014                   | 74/482 (15%)                         | 84/482 (17%)                     | 0.1468                                  |
|                                    | 2015                   | 82/482 (17%)                         | 89/482 (18%)                     | 0.1468                                  |
|                                    | 2016                   | 90/482 (19%)                         | 77/482 (16%)                     | 0.1468                                  |
|                                    | 2017                   | 27/482 (6%)                          | 17/482 (4%)                      | 0.1468                                  |
| Gestational age (wk), n, mean (SD) |                        | 482, 24.4 (1.1)                      | 482, 24.4 (1.1)                  | 0.0000                                  |
| Outborn                            |                        | 8/482 (2%)                           | 10/482 (2%)                      | 0.0307                                  |
| Male                               |                        | 270/482 (56%)                        | 270/482 (56%)                    | 0.0000                                  |
| Small for gestational age          |                        | 41/482 (9%)                          | 51/482 (11%)                     | 0.0707                                  |

**eTable 5.** Characteristics of corticosteroid-treated infants and untreated controls in the final matched cohort

| <i>Variable</i>                                                          |                            | <i>Corticosteroid<br/>Treated<br/>N = 482</i> | <i>Untreated<br/>controls<br/>N = 482</i> | <i>Standardized<br/>Difference<sup>a</sup></i> |
|--------------------------------------------------------------------------|----------------------------|-----------------------------------------------|-------------------------------------------|------------------------------------------------|
| Chest compressions/epinephrine in the delivery room                      |                            | 40/482 (8%)                                   | 41/482 (9%)                               | 0.0075                                         |
| Intubation in the delivery room                                          |                            | 415/482 (86%)                                 | 426/482 (88%)                             | 0.0684                                         |
| Surfactant                                                               |                            | 463/482 (96%)                                 | 469/482 (97%)                             | 0.0695                                         |
| Chorioamnionitis                                                         |                            | 85/482 (18%)                                  | 78/482 (16%)                              | 0.0388                                         |
| Hypotension treatment in the first 24hr of age                           |                            | 191/482 (40%)                                 | 180/482 (37%)                             | 0.0469                                         |
| Indomethacin in the first 24hr of age                                    |                            | 182/482 (38%)                                 | 187/482 (39%)                             | 0.0213                                         |
| Enteral feeds initiated within 7 days of age                             |                            | 411/482 (85%)                                 | 415/482 (86%)                             | 0.0237                                         |
| Highest mode of respiratory support at 24hr of age                       | High frequency ventilation | 117/482 (24%)                                 | 124/482 (26%)                             | 0.1128                                         |
|                                                                          | Conventional ventilation   | 285/482 (59%)                                 | 292/482 (61%)                             | 0.1128                                         |
|                                                                          | NIMV                       | 22/482 (5%)                                   | 15/482 (3%)                               | 0.1128                                         |
|                                                                          | nCPAP                      | 53/482 (11%)                                  | 49/482 (10%)                              | 0.1128                                         |
|                                                                          | NC, Hood, or No support    | 5/482 (1%)                                    | 2/482 (0%)                                | 0.1128                                         |
| FiO <sub>2</sub> at 24hr of age                                          | 21%                        | 71/482 (15%)                                  | 94/482 (20%)                              | 0.1645                                         |
|                                                                          | 22% to 30%                 | 185/482 (38%)                                 | 176/482 (37%)                             | 0.1645                                         |
|                                                                          | 31% to 40%                 | 118/482 (24%)                                 | 98/482 (20%)                              | 0.1645                                         |
|                                                                          | 41% to 50%                 | 47/482 (10%)                                  | 45/482 (9%)                               | 0.1645                                         |
|                                                                          | 51% to 99%                 | 43/482 (9%)                                   | 44/482 (9%)                               | 0.1645                                         |
|                                                                          | 100%                       | 18/482 (4%)                                   | 25/482 (5%)                               | 0.1645                                         |
| Grade 3-4 intraventricular hemorrhage                                    |                            | 68/482 (14%)                                  | 69/482 (14%)                              | 0.0059                                         |
| Surgical necrotizing enterocolitis or spontaneous intestinal perforation |                            | 35/482 (7%)                                   | 41/482 (9%)                               | 0.0462                                         |
| Culture confirmed sepsis or meningitis                                   |                            | 102/482 (21%)                                 | 92/482 (19%)                              | 0.0518                                         |
| Treatment with nitric oxide                                              |                            | 66/482 (14%)                                  | 68/482 (14%)                              | 0.0120                                         |
| Last recorded FiO <sub>2</sub> , n, mean (SD)                            | 21% to 30%                 | 56/482 (12%)                                  | 57/482 (12%)                              | 0.0345                                         |
|                                                                          | 31% to 40%                 | 105/482 (22%)                                 | 101/482 (21%)                             | 0.0345                                         |
|                                                                          | 41% to 50%                 | 82/482 (17%)                                  | 85/482 (18%)                              | 0.0345                                         |
|                                                                          | 51% to 99%                 | 172/482 (36%)                                 | 171/482 (35%)                             | 0.0345                                         |

**eTable 5.** Characteristics of corticosteroid-treated infants and untreated controls in the final matched cohort

| <i>Variable</i>                                                                  |                            | <i>Corticosteroid Treated<br/>N = 482</i> | <i>Untreated controls<br/>N = 482</i> | <i>Standardized Difference<sup>a</sup></i> |
|----------------------------------------------------------------------------------|----------------------------|-------------------------------------------|---------------------------------------|--------------------------------------------|
| Last recorded FiO <sub>2</sub> , <i>cont.</i>                                    | 100%                       | 62/482 (13%)                              | 64/482 (13%)                          | 0.0345                                     |
| Last recorded highest mode of respiratory support                                | High frequency ventilation | 213/482 (44%)                             | 213/482 (44%)                         | 0.0000                                     |
|                                                                                  | Conventional ventilation   | 240/482 (50%)                             | 240/482 (50%)                         | 0.0000                                     |
|                                                                                  | NIMV                       | 14/482 (3%)                               | 14/482 (3%)                           | 0.0000                                     |
|                                                                                  | nCPAP                      | 14/482 (3%)                               | 14/482 (3%)                           | 0.0000                                     |
|                                                                                  | NC, Hood, or No support    | 1/482 (0%)                                | 1/482 (0%)                            | 0.0000                                     |
| Days on invasive ventilation, n, mean (SD)                                       |                            | 482, 18.6 (7.8)                           | 482, 18.5 (8)                         | 0.0058                                     |
| Days on positive airway pressure, n, mean (SD)                                   |                            | 482, 20.4 (7.7)                           | 482, 20.4 (7.6)                       | 0.0016                                     |
| Propensity score, n, mean (SD)                                                   |                            | 482, 0.52 (0.25)                          | 482, 0.5 (0.24)                       | 0.0839                                     |
| Pre-treatment probability of death or grade 2-3 BPD, n, mean (SD)                |                            | 482, 0.53 (0.22)                          | 482, 0.53 (0.22)                      | 0.0126                                     |
| PMA at corticosteroid initiation (or equivalent for controls) (wk), n, mean (SD) |                            | 482, 27.82 (1.73)                         | 482, 27.82 (1.73)                     | 0.0000                                     |
| PMA at corticosteroid initiation (or equivalent for controls) (wk)               | 23                         | 3/482 (1%)                                | 3/482 (1%)                            | 0.0000                                     |
|                                                                                  | 24                         | 10/482 (2%)                               | 10/482 (2%)                           | 0.0000                                     |
|                                                                                  | 25                         | 31/482 (6%)                               | 31/482 (6%)                           | 0.0000                                     |
|                                                                                  | 26                         | 68/482 (14%)                              | 68/482 (14%)                          | 0.0000                                     |
|                                                                                  | 27                         | 89/482 (18%)                              | 89/482 (18%)                          | 0.0000                                     |
|                                                                                  | 28                         | 108/482 (22%)                             | 108/482 (22%)                         | 0.0000                                     |
|                                                                                  | 29                         | 94/482 (20%)                              | 94/482 (20%)                          | 0.0000                                     |
|                                                                                  | 30                         | 50/482 (10%)                              | 50/482 (10%)                          | 0.0000                                     |
|                                                                                  | 31                         | 25/482 (5%)                               | 25/482 (5%)                           | 0.0000                                     |
|                                                                                  | 32                         | 4/482 (1%)                                | 4/482 (1%)                            | 0.0000                                     |
| Day of respiratory support snapshot used in the analysis                         | Day 7                      | 27/482 (6%)                               | 27/482 (6%)                           | 0.0000                                     |
|                                                                                  | Day 14                     | 211/482 (44%)                             | 211/482 (44%)                         | 0.0000                                     |
|                                                                                  | Day 28                     | 244/482 (51%)                             | 244/482 (51%)                         | 0.0000                                     |
| Center                                                                           | 1                          | 35/482 (7%)                               | 26/482 (5%)                           | 0.1647                                     |
|                                                                                  | 2                          | 9/482 (2%)                                | 11/482 (2%)                           | 0.1647                                     |

**eTable 5.** Characteristics of corticosteroid-treated infants and untreated controls in the final matched cohort

| Variable      |    | Corticosteroid<br>Treated<br>N = 482 | Untreated<br>controls<br>N = 482 | Standardized<br>Difference <sup>a</sup> |
|---------------|----|--------------------------------------|----------------------------------|-----------------------------------------|
| Center, cont. | 3  | 5/482 (1%)                           | 5/482 (1%)                       | 0.1647                                  |
|               | 4  | 6/482 (1%)                           | 9/482 (2%)                       | 0.1647                                  |
|               | 5  | 49/482 (10%)                         | 49/482 (10%)                     | 0.1647                                  |
|               | 6  | 17/482 (4%)                          | 21/482 (4%)                      | 0.1647                                  |
|               | 7  | 23/482 (5%)                          | 22/482 (5%)                      | 0.1647                                  |
|               | 8  | 14/482 (3%)                          | 11/482 (2%)                      | 0.1647                                  |
|               | 9  | 42/482 (9%)                          | 41/482 (9%)                      | 0.1647                                  |
|               | 10 | 39/482 (8%)                          | 47/482 (10%)                     | 0.1647                                  |
|               | 11 | 65/482 (13%)                         | 63/482 (13%)                     | 0.1647                                  |
|               | 12 | 49/482 (10%)                         | 53/482 (11%)                     | 0.1647                                  |
|               | 13 | 17/482 (4%)                          | 12/482 (2%)                      | 0.1647                                  |
|               | 14 | 9/482 (2%)                           | 9/482 (2%)                       | 0.1647                                  |
|               | 15 | 46/482 (10%)                         | 39/482 (8%)                      | 0.1647                                  |
|               | 16 | 36/482 (7%)                          | 37/482 (8%)                      | 0.1647                                  |
|               | 17 | 6/482 (1%)                           | 7/482 (1%)                       | 0.1647                                  |
|               | 18 | 6/482 (1%)                           | 6/482 (1%)                       | 0.1647                                  |
|               | 19 | 9/482 (2%)                           | 14/482 (3%)                      | 0.1647                                  |

<sup>a</sup> Data are absolute values

Abbreviations: BPD, bronchopulmonary dysplasia; FiO<sub>2</sub>, fraction of inspired oxygen; n, number of infants with evaluable data for the specified characteristic; NC, nasal cannula; nCPAP, nasal continuous positive airway pressure; NIMV, non-invasive mechanical ventilation; SD, standard deviation; PMA, postmenstrual age

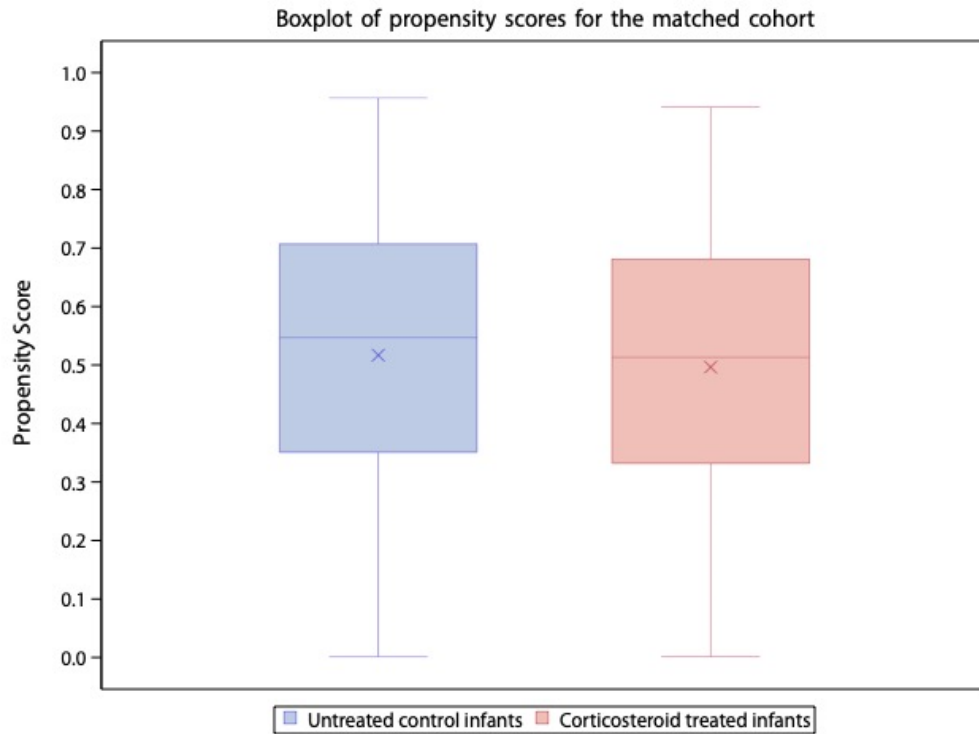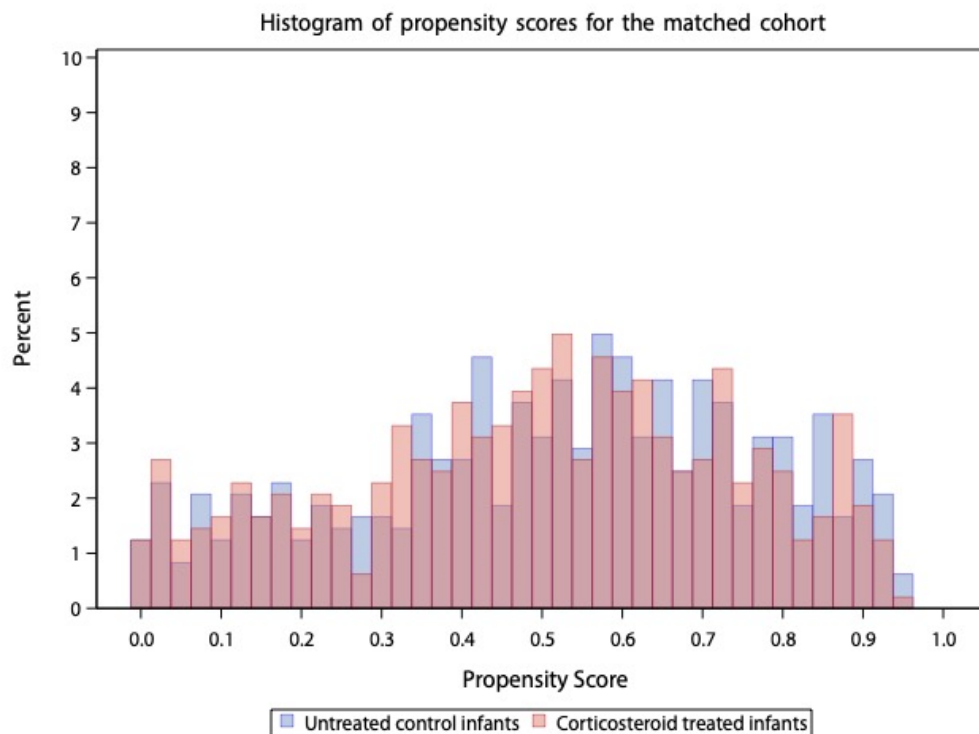

**eFigure 1. Distribution of propensity scores in the matched cohort.**

Box plots (top) and histograms (bottom) showing propensity score values calculated in the 482 corticosteroid-treated infants (red) and 482 untreated controls (blue) in the matched study cohort. The x in the top plot displays the mean propensity score values in the two groups.

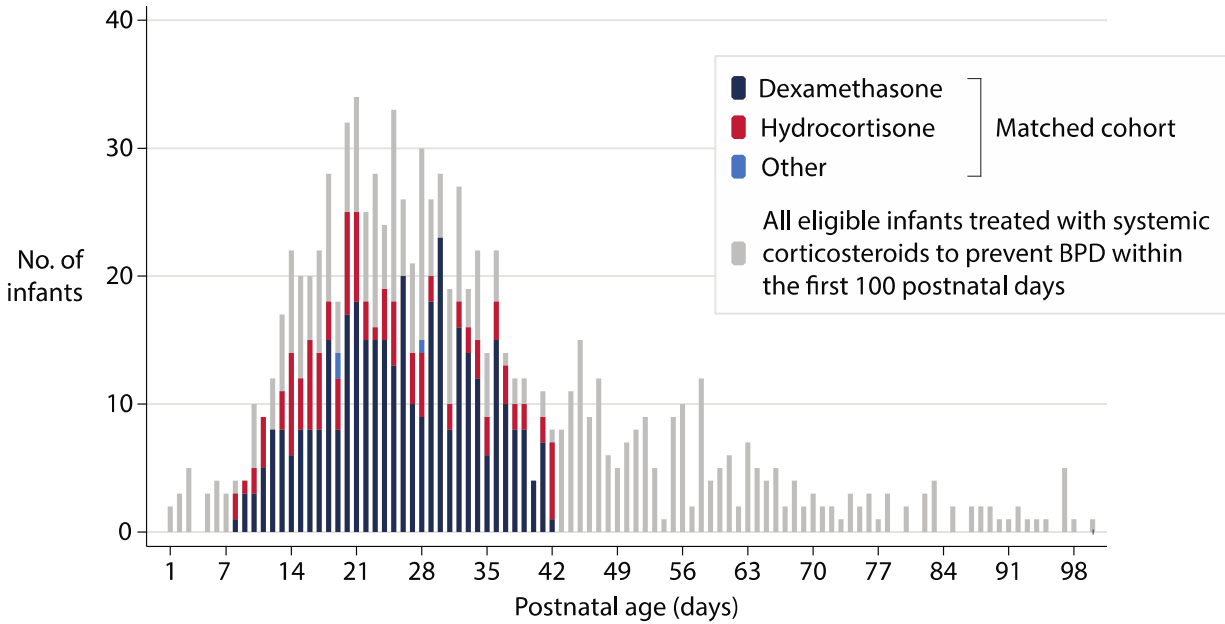

**eFigure 2. Distribution of the timing of corticosteroid initiation.**

The stacked colored bars represent the number of corticosteroid-treated infants in the matched cohort who initiated corticosteroid treatment between postnatal days 8 and 42, stratified by corticosteroid type. The mean (standard deviation) age at corticosteroid initiation among matched infants was 25.2 (8.5) days. The underlaid gray bars represent the total number of corticosteroid-treated infants who were eligible for the study and initiated corticosteroid therapy within the first 100 postnatal days.



**eTable 6.** Rates and timing of mortality in the matched cohort

| <i>Outcome</i>                                     | <i>Corticosteroid-treated<br/>infants<br/>N = 482</i> | <i>Untreated control<br/>infants<br/>N = 482</i> |
|----------------------------------------------------|-------------------------------------------------------|--------------------------------------------------|
| Died prior to 36 weeks' PMA                        | 49 (10.2)                                             | 103 (21.4)                                       |
| Died between 36 weeks' PMA<br>and 2-year follow-up | 44 (9.1)                                              | 15 (3.1)                                         |
| Survived to 2-year follow-up                       | 389 (80.7)                                            | 364 (75.5)                                       |

*Values displayed as n (%); PMA, postmenstrual age*

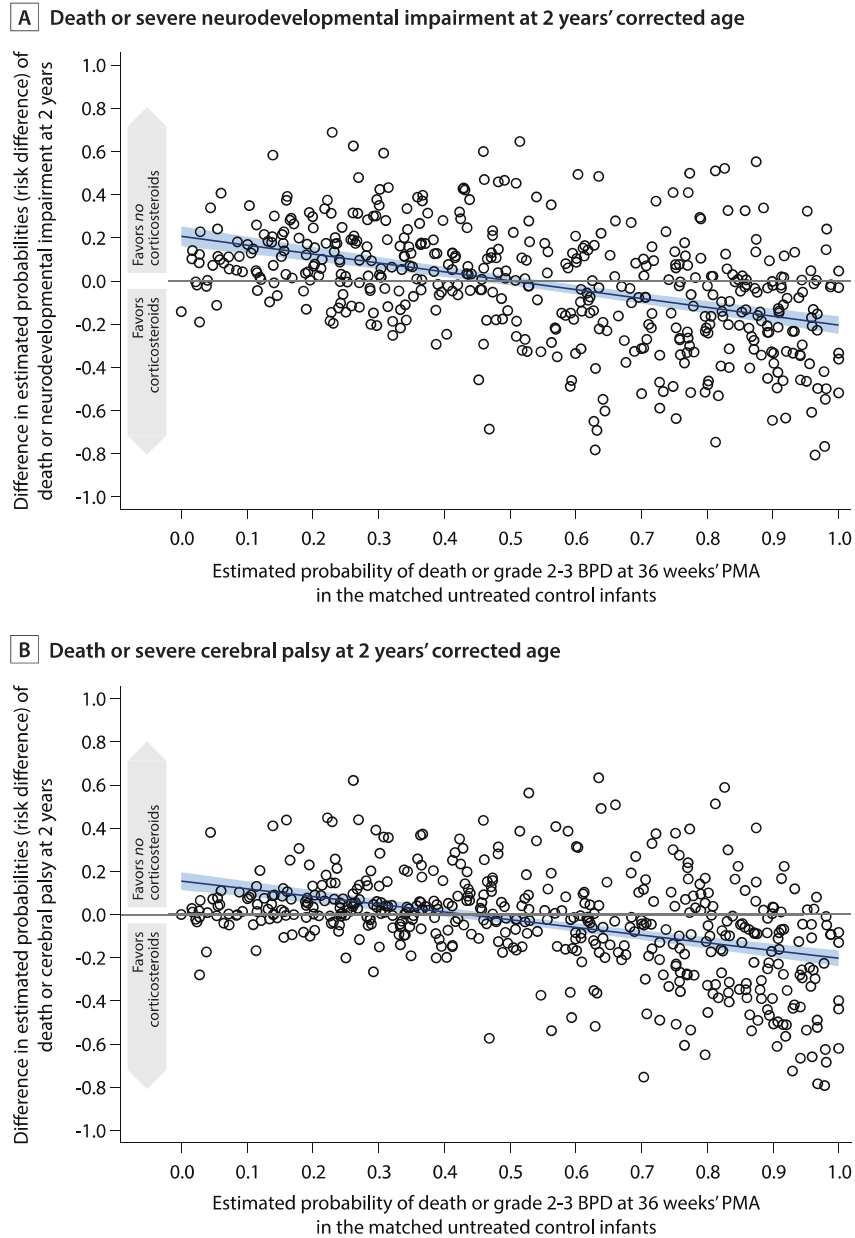

**eFigure 3. Risk differences for death or severe disability versus the probability of death or grade 2-3 bronchopulmonary dysplasia (BPD) at 36 weeks' postmenstrual age (PMA).** Plot (A) shows the results for death or severe neurodevelopmental impairment (NDI) at 2 years' corrected age. Plot (B) shows the results for death or severe cerebral palsy (CP) at 2 years' corrected age. The probability of death or grade 2-3 BPD was estimated using data collected up until the time of corticosteroid initiation or the equivalent PMA week in the matched untreated control. Circles represent values computed for individual matched pairs. The fitted regression lines and their shaded 95% confidence intervals are shown. *Death or severe NDI:* For each 10% increase in the pre-treatment probability of death or grade 2-3 BPD, the risk difference for death or severe NDI decreased by 4.1% (95% CI 3.4% - 4.9%; regression line equation:  $y=0.207 - 0.411x$ ). The fitted regression line crosses the x-axis at a probability of death or grade 2-3 BPD of 50% (95% confidence bands cross at 45% and 55%). *Death or severe CP:* For each 10% increase in the pre-treatment probability of death or grade 2-3 BPD, the risk difference for death or severe CP decreased by 3.6% (95% CI 2.9% - 4.2%; regression line

equation:  $y=0.155 - 0.357x$ ). The regression line crosses the x-axis at a pre-treatment probability of death of grade 2-3 BPD of 43% (95% confidence bands cross at 37% and 49%).

**A** Death or moderate to severe neurodevelopmental impairment at 2 years' corrected age

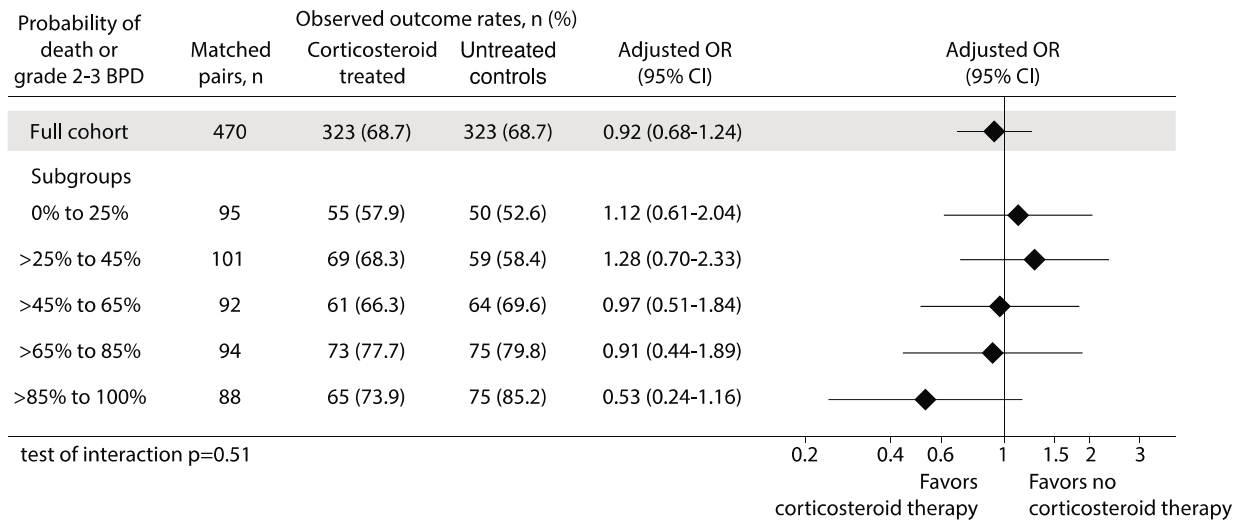

**B** Death or moderate to severe cerebral palsy at 2 years' corrected age

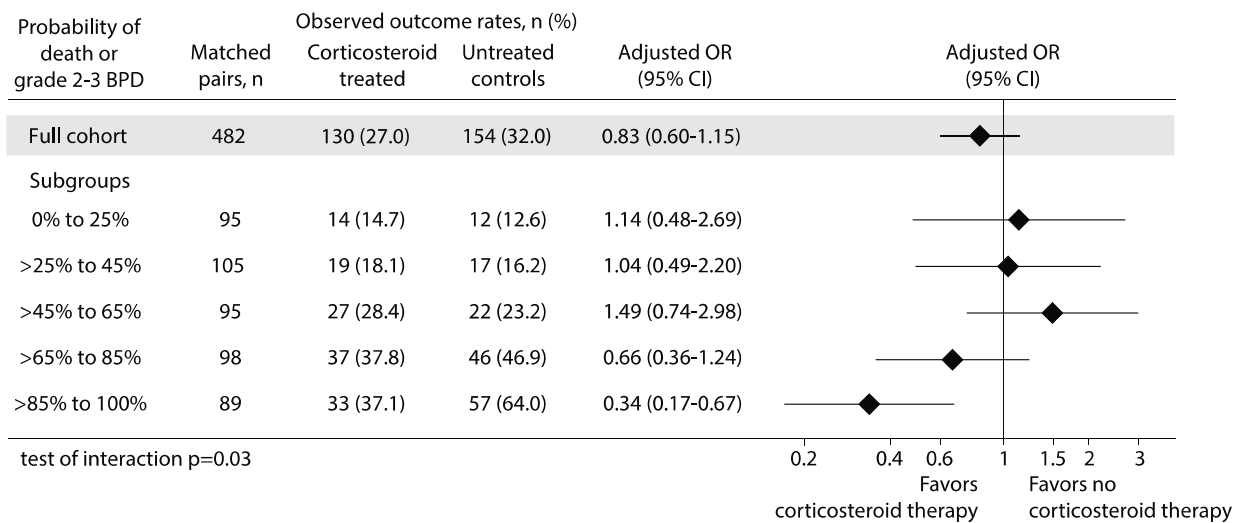

**eFigure 4. Odds ratios for death or moderate-to-severe disability stratified by the pre-treatment probability of death or grade 2-3 BPD as a 5-level categorical variable.**

Observed rates and corresponding adjusted odds ratios (OR) with 95% confidence intervals (CI) for (A) death or moderate-to-severe neurodevelopmental impairment at 2 years' corrected age and (B) death or moderate-to-severe cerebral palsy by 2 years' corrected age, in the full matched cohort and stratified by the estimated pre-treatment probability of death or grade 2-3 bronchopulmonary dysplasia (BPD) at 36 weeks' postmenstrual age (PMA). OR were estimated using logistic regression and adjusted for the following explanatory variables: corticosteroid treatment status, pre-treatment probability of early death or grade 2-3 BPD strata, corticosteroid treatment status × pre-treatment probability stratum interaction term, PMA week at corticosteroid initiation or the equivalent week in the untreated matched control, and center. *n*, number of infants

**A** Death or severe neurodevelopmental impairment at 2 years' corrected age

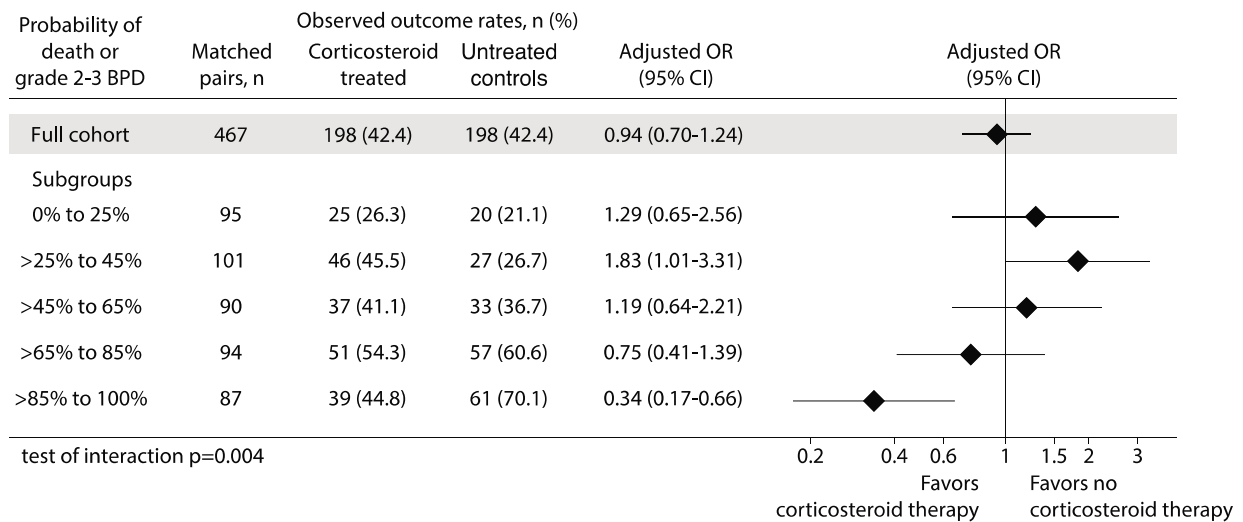

**B** Death or severe cerebral palsy at 2 years' corrected age

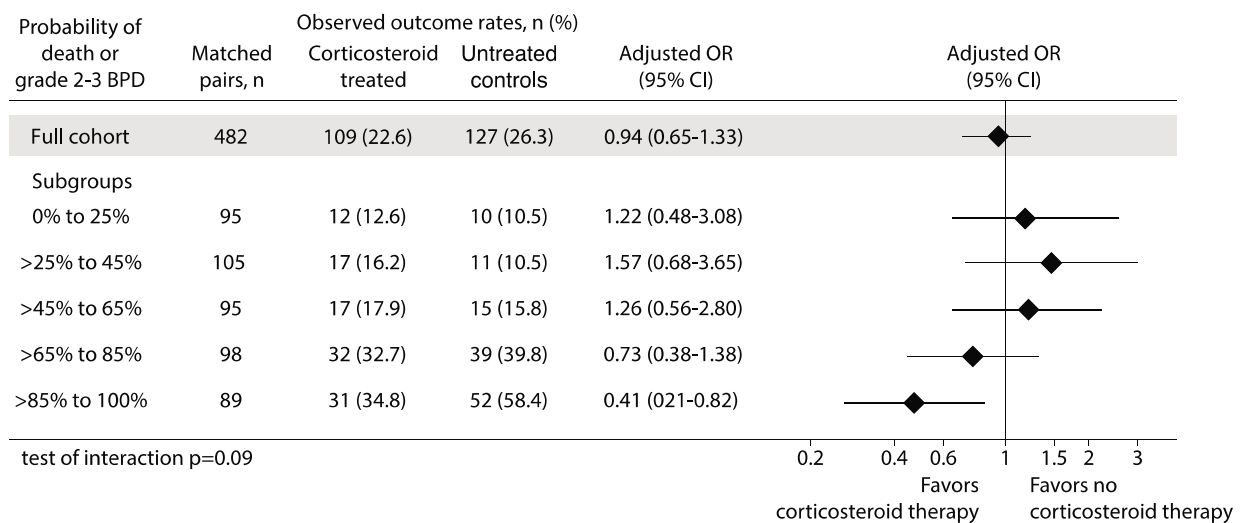

**eFigure 5. Odds ratios for death or severe disability stratified by the pre-treatment probability of death or grade 2-3 BPD as a 5-level categorical variable.**

Observed rates and corresponding adjusted odds ratios (OR) with 95% confidence intervals (CI) for (A) death or severe neurodevelopmental impairment at 2 years' corrected age and (B) death or severe cerebral palsy by 2 years' corrected age, in the full matched cohort and stratified by the estimated pre-treatment probability of death or grade 2-3 bronchopulmonary dysplasia (BPD) at 36 weeks' postmenstrual age (PMA). Odds ratios were estimated using logistic regression and adjusted for the following explanatory variables: corticosteroid treatment status, pre-treatment probability of early death or grade 2-3 BPD strata, corticosteroid treatment status × pre-treatment probability stratum interaction term, PMA week at corticosteroid initiation or the equivalent week in the untreated matched control, and center. *n*, number of infants

**A** Death or moderate to severe neurodevelopmental impairment at 2 years' corrected age

**Dexamethasone vs. no treatment**

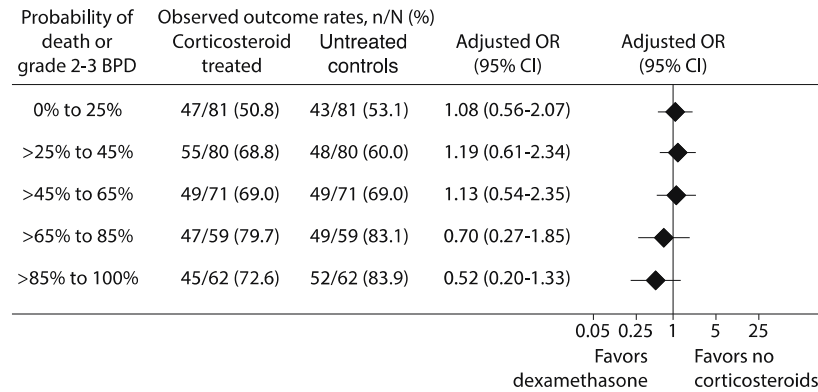

**Hydrocortisone vs. no treatment**

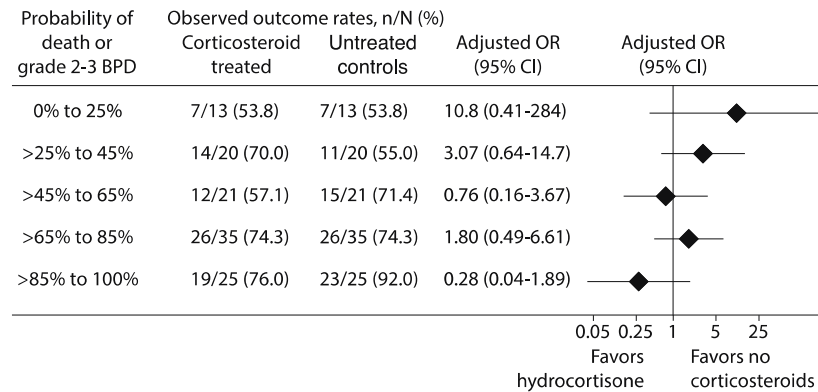

**B** Death or moderate to severe cerebral palsy at 2 years' corrected age

**Dexamethasone vs. no treatment**

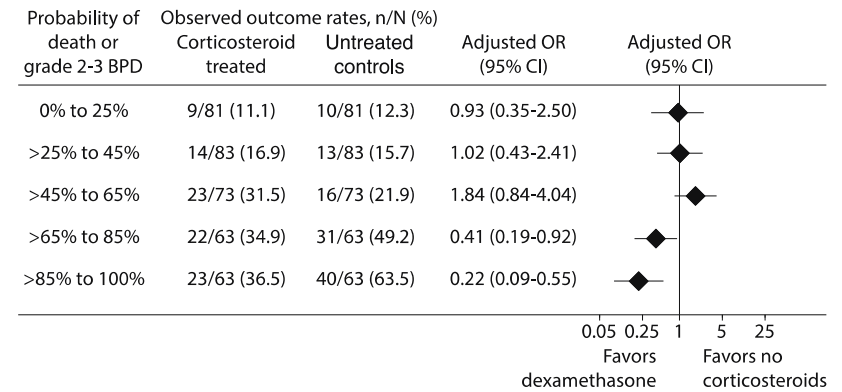

**Hydrocortisone vs. no treatment**

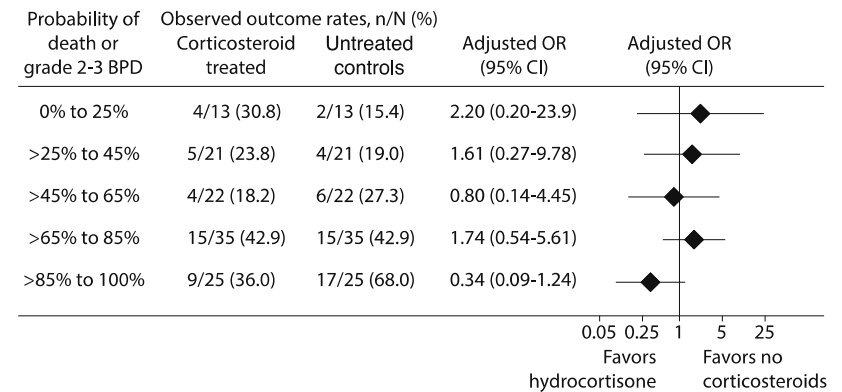

**eFigure 6. Odds ratios for death or moderate to severe disability stratified by treatment with dexamethasone vs. hydrocortisone.**

Observed rates and corresponding adjusted odds ratios (OR) with 95% confidence intervals (CI) for (A) death or moderate-to-severe neurodevelopmental impairment at 2 years' corrected age and (B) death or moderate-to-severe cerebral palsy by 2 years' corrected age, stratified by the estimated pre-treatment probability of death or grade 2-3 bronchopulmonary dysplasia (BPD) at 36 weeks' postmenstrual age (PMA) and by treatment with dexamethasone (top) or hydrocortisone (bottom). Observed outcome rates are reported for infants with a known 2-year outcome. ORs estimated using logistic regression and adjusted for the following explanatory variables: corticosteroid treatment status, pre-treatment probability of death or grade 2-3 BPD strata, corticosteroid treatment status × pre-treatment probability stratum interaction, PMA week at corticosteroid initiation or the equivalent week in the untreated matched control, and center.

*n*, number of infants with the specified outcome; *N*, number of infants with evaluable data for the specified outcome.
