# Supplementary material for: Assessment of Corticosteroid Therapy and Death or Disability According to Pretreatment Risk of Death or Bronchopulmonary Dysplasia in Extremely Preterm Infants
Source: PubMed Central journal article supplement (PMC10167571; doi:10.1001/jamanetworkopen.2023.12277), 2023-05-08
Supplement: jamanetwopen-e2312277-s003.pdf [file jamanetwopen-e2312277-s003.pdf]

## Data Sharing Statement

Jensen. Assessment of Corticosteroid Therapy and Death or Disability According to Pretreatment Risk of Death or Bronchopulmonary Dysplasia in Extremely Preterm Infants. *JAMA Netw Open*. Published May 08, 2023. doi:10.1001/jamanetworkopen.2023.12277

### Data

**Data available:** Yes

**Data types:** Deidentified participant data

**How to access data:** RTI.org

**When available:** With publication

### Supporting Documents

**Document types:** None

### Additional Information

**Who can access the data:** researchers whose proposed use of the data has been approved by the NICHD neonatal research network.

**Types of analyses:** Use will be considered based on NRN approval.

**Mechanisms of data availability:** Details available at RTI.org
